# Supplementary material for: A Comparative Study of Asymptomatic Malaria in a Forest Rural and Depleted Forest Urban Setting during a Low Malaria Transmission and COVID-19 Pandemic Period
Source: Biomed Res Int. 2022 Oct 15;2022:2545830. doi: 10.1155/2022/2545830 (PMC9587908; doi:10.1155/2022/2545830)
Supplement: Supplementary Materials — Supplementary Table 1 shows the association between variables and CareStart™ Malaria P. falciparum (HRP2) Ag. RDT strip test status. [file 2545830.f1.docx]

# BioMed Research International

**A Comparative Study of Asymptomatic Malaria in a Forest Rural and Depleted Forest Urban Setting During a Low Malaria Transmission and COVID-19 Pandemic Period.**

Clarisse E. Mbah,1,2,# Lum A. Ambe,1,2,# Ngwewondo Adela,1 Elvis B. Kidzeru,1,3,4 Akwah Lilian,1,5 Mountchissi Celestin,1 Mohamadou Mansour,1,5 Edward N. Sahfe,1 Rene´ Kamgang,1 Lucia Nkengazong1

1Institute of Medical Research and Medicinal Plants Studies (IMPM), Centre for Research on Health and Priority Pathologies (CRSPP), P.O Box 13033 Yaoundé, Cameroon.

2Departments of Microbiology and Parasitology, Faculty of Science, University of Buea, P.O Box 63 Buea, Cameroon.

3Hair and Skin Research Laboratory, Division of Dermatology, Department of Medicine, Faculty of Health Sciences and Groote Schuur Hospital, University of Cape Town, Cape Town, South Africa.

4National Health Laboratory Service (NHLS) Tygerberg Laboratories, Medical Microbiology, Immunology and Virology laboratories, Division of Medical Microbiology and Immunology, Department of Pathology, Stellenbosch University.

5University of Yaoundé 1, Cameroon, Faculty of Science, Microbiology Department, Cameroon

#These authors are first authors of this work

Correspondence should be addressed to Lum A. Ambe; [lumabienwiambe@yahoo.com](mailto:lumabienwiambe@yahoo.com)

**Supplementary Table 1: Association between variables and CareStartTM Malaria *P. falciparum* (HRP2) Ag RDT strip test status. Bold text represents statistical significance.**

| Variables | Category | RDT Positive (%) | RDT Negative (%) | p-value** |
| --- | --- | --- | --- | --- |
| Community | *Total* | *83 (27.0)* | *224 (73.0)* | **<0.001** |
| Rural | 78 (41.5) | 110 (58.5) |
| Urban | 5 (4.2) | 114 (95.8) |
| Age (years) | 0-4 | 5 (26.3) | 14 (73.7) | 0.543* |
| 5-9 | 7 (24.1) | 22 (75.9) |
| 10-14 | 14 (34.1) | 27 (65.9) |
| ≥15 | 57 (26.1) | 161 (73.9 |
| Gender | Female | 48 (25.7) | 139 (74.3) | 0.501$ |
| Male | 35 | 85 |
| Farm around the house | Yes | 82 (31.7) | 177 (68.3) | **<0.001** |
| No | 1 (2.1) | 46 (97.9) |
| Occupation | Professional | 0 (0.0) | 25 (100) | **0.001** |
| Skilled | 7 (22.6) | 24 (77.4) |
| Other | 76 (30.3) | 175 (69.7) |
| Sleep under net | Yes | 4 (6.0) | 63 (94.0) | 0.653 |
| No | 1 (2.7) | 36 (97.3) |

**Fisher’s exact unless otherwise noted, *Rank sum test, $Chi square tests
